# Supplementary material
Source: PubMed Central journal article supplement (PMC6894377)
Supplement: jnm226993SupplementaryData.pdf [file jnm226993SupplementaryData.pdf]

## SUPPLEMENTAL DATA

**Supplemental Table 1.** The PET/CT-derived  $^{68}\text{Ga}$ -FAPI-04 uptake (1 h p.i.) in the heart and neighbouring organs 6 days after coronary ligation (n=6).

| <b>Region</b>                   | <b>%ID/g</b>    | <b>Infarct-to-organ ratios</b> |
|---------------------------------|-----------------|--------------------------------|
| <b>Infarcted myocardium</b>     | $1.0 \pm 0.2$   | 1                              |
| <b>Non-infarcted myocardium</b> | $0.2 \pm 0.1$   | $6 \pm 2$                      |
| <b>Blood</b>                    | $0.24 \pm 0.03$ | $4 \pm 1$                      |
| <b>Liver</b>                    | $0.09 \pm 0.04$ | $11 \pm 3$                     |
| <b>Lung</b>                     | $0.09 \pm 0.01$ | $9 \pm 1$                      |

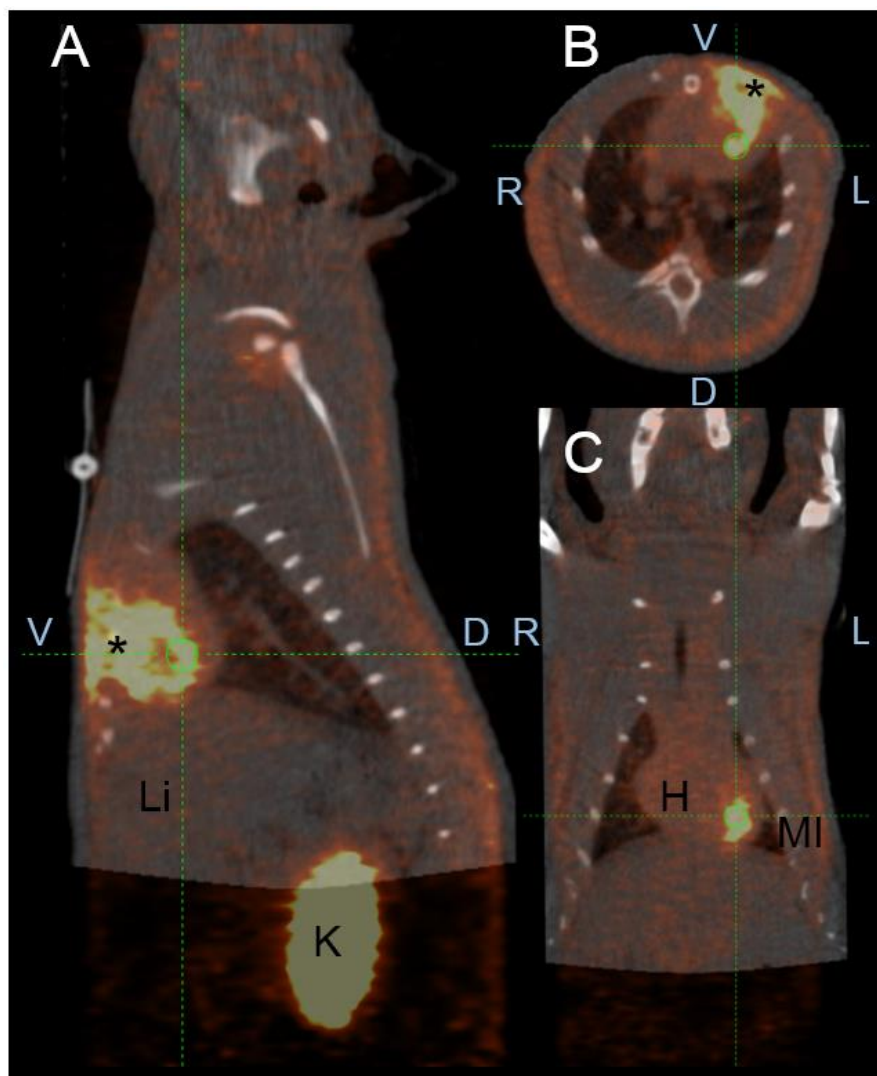

**Supplemental Figure 1.** In vivo imaging of  $^{68}\text{Ga}$ -FAPI-04 uptake. (A) Sagittal, (B) axial, and (C) coronal PET/CT images of a rat 1 h p.i. of  $^{68}\text{Ga}$ -FAPI-04, 6 days after coronary ligation. The images demonstrate rapid clearance of  $^{68}\text{Ga}$ -FAPI-04 from the body via renal filtration. Because of the small field of view (12.7 cm) for Siemens Inveon PET/CT, the entire length of the animal anatomy is not covered.

**A**

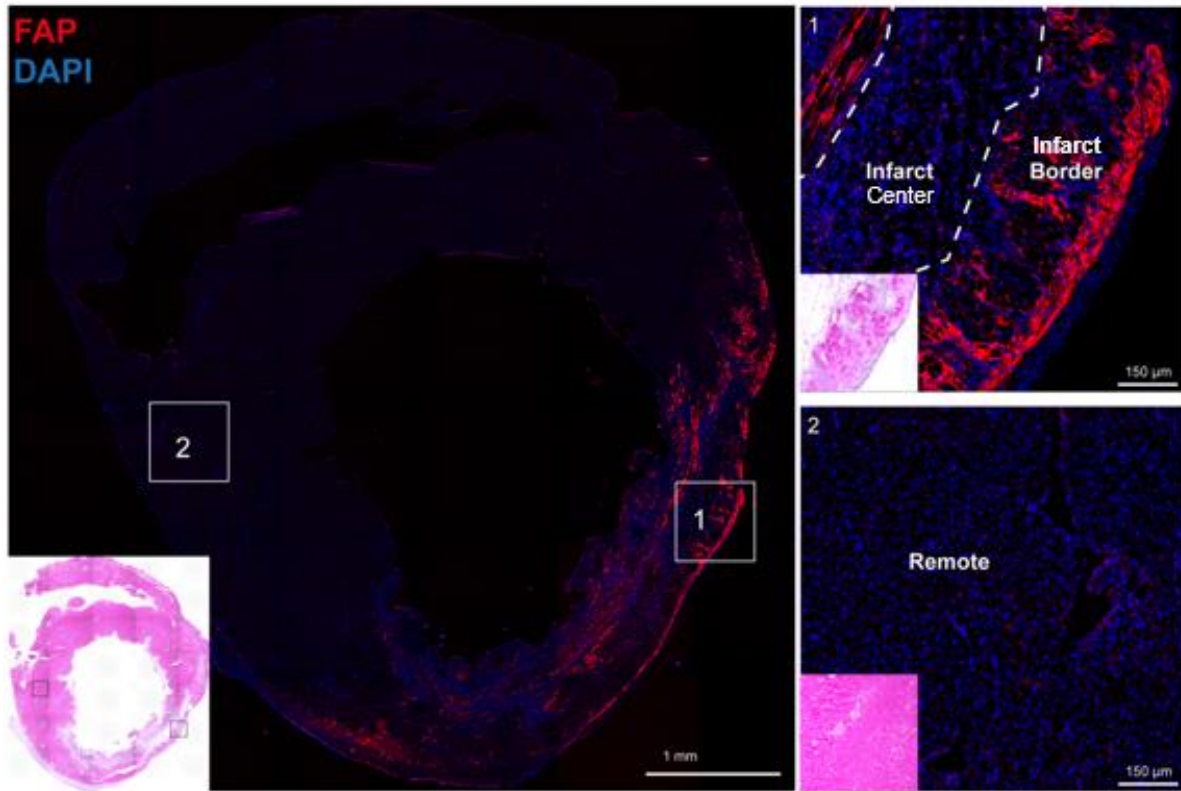

**B**

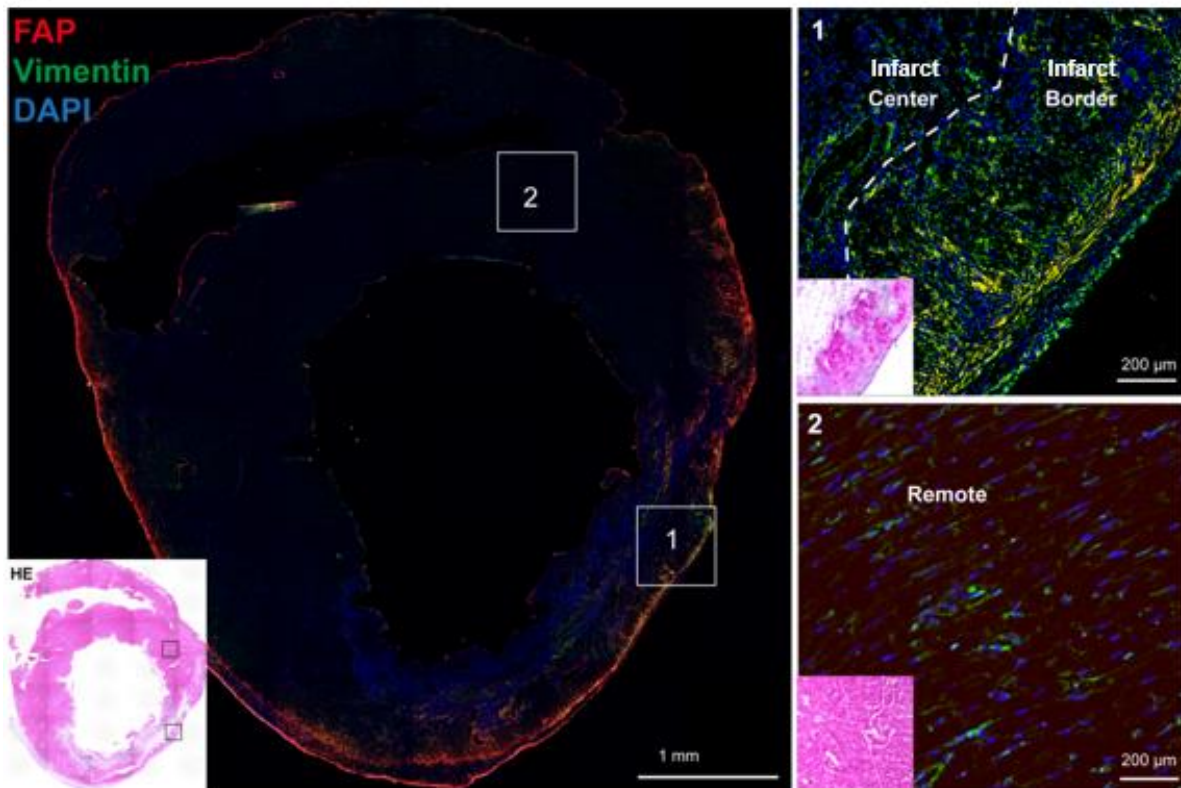

**Supplemental Figure 2.** Composite tile image of an entire infarcted rat heart slice and higher magnification images showing the location of FAP<sup>+</sup> (A) and FAP<sup>+</sup> vimentin<sup>+</sup> (B) fibroblasts. FAP<sup>+</sup> vimentin<sup>+</sup> activated fibroblasts were especially accumulated within the border zone connective tissue compared to the infarct centre and remote area, while FAP<sup>-</sup> vimentin<sup>+</sup> fibroblasts were abundant in the infarct centre or distant remote zone of the left ventricle. Overlapping domains of expression (FAP + vimentin) are shown in yellow. DAPI stained nuclei are shown in blue.

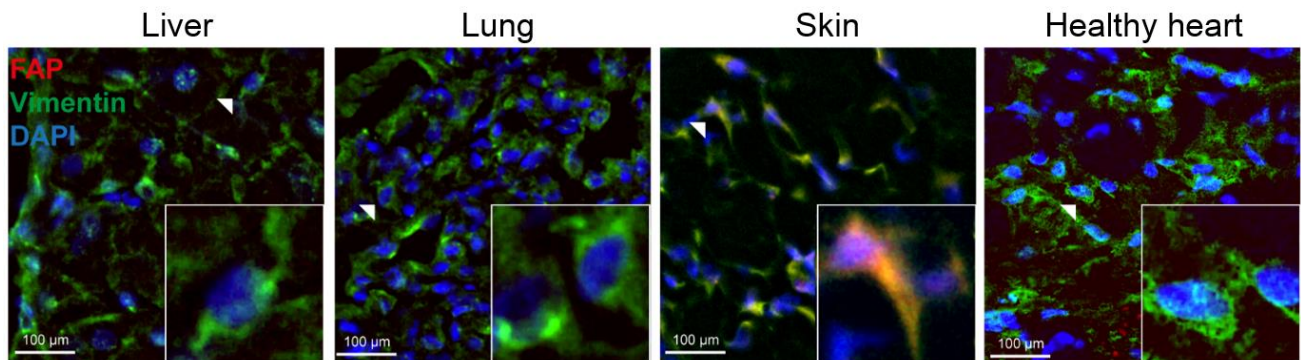

**Supplemental Figure 3.** FAP expression in normal tissue-resident fibroblasts. FAP<sup>+</sup> cells were scarce among vimentin<sup>+</sup> fibroblasts in liver, lung, and heart of control healthy animals. FAP<sup>+</sup> vimentin<sup>+</sup> fibroblasts were observed in skin. Overlapping domains of expression are shown in yellow. DAPI stained nuclei are shown in blue.
